1  
2  
3  
4  
5  
6  
7  
8  
9  
10  
11  
12  
13  
14  
15  
16  
17  
18  
19  
20  
21  
22  
23  
24  
25  
26  
27  
28  
29  
30

**Remodeling of *Mycobacterium tuberculosis* lipids regulates *prpCD* during acid growth arrest**

Jacob J. Baker and Robert B. Abramovitch\*

Department of Microbiology and Molecular Genetics, Michigan State University, East Lansing, Michigan, 48824, United States.

*\*Corresponding Author*  
Robert B. Abramovitch  
E-mail: [abramov5@msu.edu](mailto:abramov5@msu.edu)  
Phone: (517) 884-5416  
Fax: (517) 353-8957

31 **Abstract**

32 *Mycobacterium tuberculosis* (Mtb) establishes a state of non-replicating persistence  
33 when it is cultured at acidic pH with glycerol as a sole carbon source. Growth can be  
34 restored by spontaneous mutations in the *ppe51* gene or supplementation with pyruvate,  
35 supporting that acid growth arrests is a genetically controlled, adaptive process and not  
36 simply a physiological limitation associated with acidic pH. Transcriptional profiling  
37 identified the methylcitrate synthase and methylcitrate dehydratase genes (*prpC* and  
38 *prpD*, respectively) as being selectively induced during acid growth arrest. *prpCD* along  
39 with isocitrate lyase (*icl*) enable Mtb to detoxify propionyl-CoA through the methylcitrate  
40 cycle. The goal of this study was to examine mechanisms underlying the regulation of  
41 *prpCD* during acid growth arrest. Induction of *prpCD* during acid growth arrest was  
42 reduced when the medium was supplemented with vitamin B12 (which enables an  
43 alternative propionate detoxification pathway) and enhanced in an *icl* mutant (which is  
44 required for the propionate detoxification), suggesting that Mtb is responding to elevated  
45 levels of propionyl-CoA during acidic growth arrest. We hypothesized that an  
46 endogenous source of propionyl-CoA generated during metabolism of methyl-branched  
47 lipids may be regulating *prpCD*. Using Mtb radiolabeled with <sup>14</sup>C-propionate or <sup>14</sup>C-  
48 acetate, it was observed that lipids are remodeled during acid growth arrest, with  
49 triacylglycerol being catabolized and sulfolipid and trehalose dimycolate being  
50 synthesized. Blocking TAG lipolysis using the lipase inhibitor tetrahydrolipstatin,  
51 resulted in enhanced *prpC* induction during acid growth arrest, suggesting that lipid  
52 remodeling may function, in part, to detoxify propionate. Notably, *prpC* was not induced  
53 during acid growth arrest when using lactate instead of glycerol. We propose that  
54 metabolism of glycerol at acidic pH may result in the accumulation of propionyl-CoA and  
55 that lipid remodeling may function as a detoxification mechanism.

56

57 **Importance**

58

59 During infection, *Mycobacterium tuberculosis* (Mtb) colonizes acidic environments, such  
60 as the macrophage phagosome and granuloma. Understanding regulatory and  
61 metabolic adaptations that occur in response to acidic pH can provide insights into  
62 mechanisms used by the bacterium to adapt to the host. We have previously shown that  
63 Mtb exhibits pH-dependent metabolic adaptations and requires anaplerotic enzymes,  
64 such as Icl1/2 and PckA, to grow optimally at acidic pH. Additionally, we have observed  
65 that Mtb can only grow on specific carbon sources at acidic pH. Together these findings  
66 show that Mtb integrates environmental pH and carbon source to regulate its  
67 metabolism. In this study, it is shown that Mtb remodels its lipids and modulates the  
68 expression of propionyl-CoA detoxifying genes *prpCD* when grown on glycerol at acidic  
69 pH. This finding suggests that lipid remodeling at acidic pH may contribute to  
70 detoxification of propionyl-CoA, by incorporating the metabolite into methyl-branched cell  
71 envelope lipids.

72

73 **Introduction**

74

75 Survival of *Mycobacterium tuberculosis* (Mtb) during infection requires sensing  
76 and adapting to the diverse and adverse environments of the host. Growing evidence  
77 suggests that the mechanisms of Mtb adaptation during infection are unique from those  
78 required during *in vitro* culture. First, many genes dispensable for growth *in vitro* have  
79 been shown to be essential during infection(1, 2). Similarly, past efforts that identified  
80 antimycobacterial drugs with potent *in vitro* activity have been unable to achieve *in vivo*  
81 efficacy, possibly due to the distinct *in vivo* environment and the physiological state of  
82 Mtb in response to that environment(3). Thus, development of effective therapy for Mtb  
83 requires careful consideration of the environmental conditions encountered by Mtb  
84 during infection.

85 A growing body of research supports that adaptation to acidic pH is important to  
86 Mtb pathogenesis. Mtb colonizes mildly acidic environments (~pH 6.5-5.0) in the  
87 macrophage phagosome and induces genes regulated by the acidic pH-inducible  
88 PhoPR two component regulator(4-6). Mutants that are defective in maintaining cytosolic  
89 pH-homeostasis (*e.g. marP*(7, 8)) or altering gene expression in response to acidic pH  
90 (*phoPR*(5)) are strongly attenuated for growth in macrophages and infected mice(5, 7,  
91 9), supporting that acid tolerance and pH-dependent adaptations are required for Mtb  
92 pathogenesis.

93 Mtb growth at acidic pH in minimal medium requires host-associated carbon  
94 sources that function at the intersection of glycolysis and the TCA cycle (*e.g. pyruvate,*  
95 *acetate, oxaloacetate and cholesterol*)(10). In contrast, in other tested carbon sources  
96 (such as glucose or glycerol), Mtb fully arrests its growth at acidic pH, establishes a state  
97 of non-replicating persistence (NRP), and becomes tolerant to antibiotics(11). Growth-  
98 arrested Mtb is resuscitated by the addition of pyruvate showing that growth arrest is due  
99 to a pH-dependent checkpoint on metabolism or nutrient acquisition. Additionally,



100 mutations in PPE51 enable Mtb to grow in acidic medium with glycerol as a sole carbon  
101 source, demonstrating that acid growth arrest is a regulated process. This acidic pH- and  
102 carbon source-dependent NRP is a new model of Mtb persistence, that is referred to as  
103 acid growth arrest(11), and provides new opportunities to conduct studies examining  
104 mechanisms underlying how pH regulates Mtb growth, metabolism, persistence and  
105 transcriptional networks.

106       Transcriptional profiling identified several genes with strong induction at acidic  
107 pH, independent of carbon source, including genes associated with anaplerotic  
108 metabolism (e.g. *icl1*, *pckA*, *ppdK*, and *mez*), respiration (e.g. type 2 NADH  
109 dehydrogenase, *ndh*), and amino acid/nitrogen metabolism (e.g. arginine biosynthesis,  
110 *argCDFGHR*). *Icl1/2* and *pckA* are induced at acidic pH in both carbon sources and we  
111 have previously shown that they are required for optimal growth and metabolic  
112 remodeling at acidic pH(11). In addition to inducing genes involved in the anaplerotic  
113 node, we also observed that Mtb induces a subset of genes specifically during acidic pH  
114 growth arrest(10). Notably, these genes were not induced at acidic pH when  
115 supplemented with the growth permissive carbon source pyruvate. Among these acidic  
116 pH growth arrest-induced genes were two genes involved in the methylcitrate cycle,  
117 encoding methylcitrate synthase and methylcitrate dehydratase (*prpC* and *prpD*,  
118 respectively). *prpCD*, along with *icl1* which is also a methylisocitrate lyase, have been  
119 characterized for their role in the detoxification of propionyl-CoA intermediates generated  
120 from the catabolism of cholesterol as well as branched- and odd-chain fatty acids (12-  
121 16). The *prpCD* operon is induced by cholesterol, propionate and hypoxia and this  
122 induction is dependent on the SigE-regulated Rv1129c regulator (16, 17). However, Mtb  
123 cultured at acidic pH in a defined minimal medium does not have an exogenous source  
124 of propionyl-CoA, cholesterol or other branched chain precursors. Given the lack of an  
125 obvious propionyl-CoA source in the minimal medium conditions of acidic pH growth

126 arrest, understanding the mechanisms of induction of *prpCD* at acidic pH could provide  
127 further insights into the metabolic state of Mtb at acidic pH. Mtb remodels its lipids at  
128 acidic pH, including the induction of sulfolipid, 2,3-diacyltrehaloses (DAT) and penta-  
129 acyltrehaloses (PAT)(10). These lipids and other long-chain fatty acids contain methyl-  
130 branched lipids, which are preferentially labelled when Mtb is provided <sup>14</sup>C-  
131 propionate(18, 19). The goal of this study was to test the hypothesis that *prpCD* is  
132 induced during acid growth arrest due to presence of endogenous propionyl-CoA  
133 released during lipid remodeling.

134

135

## 136 **Results**

### 137 ***Transcriptional induction of prpCD during acidic growth arrest***

138 Induction of *prpCD* at acidic pH in minimal medium with glycerol as a sole carbon  
139 source was verified by quantitative PCR (Figure 1A). We hypothesized that the observed  
140 *prpCD* induction is the result of increased endogenous production of propionyl-CoA  
141 during acidic pH growth arrest. Previous work has shown that supplementation of  
142 vitamin B12 is able to relieve the requirement for *prpCD*-mediated propionyl-CoA  
143 metabolism by opening the alternative methylmalonyl pathway (14). The  
144 supplementation of vitamin B12 significantly reduced *prpCD* expression at both pH 7.0  
145 and pH 5.7 (Figure 1B). Similarly, in the  $\Delta icl1/2$  mutant that lacks methylisocitrate lyase  
146 activity, *prpC* expression was increased ~2-fold at pH 5.7 as compared to WT Mtb  
147 (Figure 1C). Together, these results support the proposal that *prpCD* induction at acidic  
148 pH is linked to propionyl-CoA metabolism.

149 Because *prpCD* expression at acidic pH responds to changes in propionyl-CoA  
150 metabolism, we sought to identify the source of propionyl-CoA that could lead to *prpCD*  
151 induction. The rich medium 7H9+OADC may contain some propionyl-CoA sources from  
152 the supplemented albumin, therefore, we tested whether there was carryover of these

153 carbon sources into the minimal medium culture. After washing Mtb cultures 3 times in  
154 minimal medium prior to transfer to acid growth arrest medium, *prpC* was still induced  
155 following 3 days of acidic growth arrest (Figure 1D). Furthermore, Mtb grown from a  
156 frozen stock grown exclusively in minimal medium containing glycerol as a single carbon  
157 source still induced *prpC* at pH 5.7 with glycerol as a sole carbon source (Figure 1D).  
158 Together, these results suggest that the induction of *prpCD* is not due to an exogenous  
159 propionyl-CoA source.

160

161 ***Mtb cell envelope remodeling under acidic pH growth arrest modulates prpCD***  
162 ***induction.***

163         Given the absence of an exogenous propionyl-CoA source, we hypothesized that  
164 one source of propionate during pH 5.7 growth arrest could be the breakdown of Mtb cell  
165 envelope or storage lipids. To test this hypothesis, Mtb was cultured in rich medium in  
166 the presence of <sup>14</sup>C-propionate or <sup>14</sup>C-acetate for 3 weeks in order to radiolabel Mtb  
167 lipids. This radiolabeled Mtb was then inoculated into minimal medium at pH 5.7  
168 containing glycerol as a single carbon source and the relative abundance of lipid species  
169 was measured over time during pH 5.7 growth arrest. The total radioactivity of the  
170 samples decreased by less than 10% through the 12-day time course (Figure 2A);  
171 however, over the same time period the relative abundance of radiolabeled  
172 triacylglycerol (TAG) decreased to one-fourth of the initial concentration while the  
173 relative abundance of both trehalose dimycolate (TDM) and sulfolipid (SL) increased ~4-  
174 fold (Figure 2B-H). This result suggests that during pH 5.7 growth arrest, Mtb may utilize  
175 endogenous TAG to remodel its cell wall through the increased synthesis of both TDM  
176 and SL.

177         To test the hypothesis that lipid remodeling is a source of endogenous propionyl-  
178 CoA during pH 5.7 growth arrest, we sought to disrupt the ability of Mtb to metabolize

179 TAG to SL and TDM. The addition of the lipase inhibitor tetrahydrolipstatin (THL) to Mtb  
180 cultures blocked the remodeling of Mtb TAG to SL and TDM (Figure 3A-C). Interestingly,  
181 despite blocking lipid remodeling, treatment with THL increased *prpC* expression during  
182 pH 5.7 growth arrest 3-fold compared to DMSO treated Mtb (Figure 3D). This result  
183 suggests that lipid remodeling of TAG to SL and TDM is not a source of *prpCD* induction  
184 at acidic pH; instead, the increase in *prpC* induction with addition of THL suggests that  
185 lipid remodeling at acidic pH may act as a mechanism to relieve propionyl-CoA stress.

186         Given that endogenous lipid remodeling does not appear to be the source of  
187 *prpC* induction at acidic pH, we sought to better understand the conditions leading to  
188 *prpCD* induction. Interestingly, although Mtb arrests growth at pH 5.7 with lactate as a  
189 single carbon source(10), induction of *prpCD* is not observed in Mtb cultured with lactate  
190 as a single carbon source (Figure 3E). This observation suggests that *prpCD* induction  
191 during pH 5.7 growth arrest is glycerol-dependent rather than growth arrest dependent.  
192 The observation that *prpCD* induction at pH 5.7 does not appear to be required for Mtb  
193 growth arrest is consistent with the previous finding that the role of *icl1/2* in growth  
194 regulation appears to be independent of the methylcitrate cycle (11).

195

## 196 **Discussion**

197

198 Transcriptional profiling experiments first indicated that *prpCD* were induced at acidic  
199 pH, but only in the presence of glycerol and not pyruvate. Under conditions of robust  
200 growth (acidic pH with pyruvate as a carbon source), *prpCD* is slightly repressed at pH  
201 5.7 as compared to pH 7.0. The loss of *prpCD* induction in the presence of vitamin B12  
202 is strongly suggestive that this response is dependent on enhanced accumulation of  
203 propionyl-CoA. Interestingly, another cistron that showed the same expression pattern  
204 (induced in glycerol and repressed in pyruvate at pH 5.7), includes the Rv2557 and  
205 Rv2558 genes. These genes have been previously shown to be induced during

206 starvation and in human granulomas (20). Although, it has previously been shown that  
207 Mtb uptakes glycerol during acid growth arrest(11), it is possible that due to a metabolic  
208 adaptation that it cannot efficiently utilize glycerol for growth, and thus acid growth  
209 arrest, may have some similarities to a carbon starvation response. This would be  
210 consistent with the observed TAG catabolism, where it could be utilized as an energy  
211 source.

212 Our initial hypothesis was that *prpCD* is induced during acid growth arrest due to  
213 the production of propionyl-CoA generated during lipid remodeling. Lipid remodeling was  
214 observed during acid growth arrest, with TAG being catabolized and TDM and SL being  
215 synthesized. However, inhibiting lipases with THL resulted in further induction of *prpCD*,  
216 a finding contrary to the initial hypothesis. Rather, this finding suggests that lipid  
217 remodeling at acidic pH may instead contribute to detoxification of propionyl-CoA, by  
218 incorporating the metabolite into methyl-branched cell envelope lipids. The metabolic  
219 coupling of propionyl-CoA metabolism to lipid synthesis at acidic pH is consistent with  
220 previous work showing lipid synthesis as a readily usable sink for propionyl-CoA  
221 incorporation (16, 21, 22). Unlike in this previous work, during acidic pH growth arrest in  
222 glycerol-containing medium, the source of propionyl-CoA appears to be endogenous  
223 rather than exogenously supplied.

224 The induction of *prpCD* during acid growth arrest was shown to be dependent on  
225 glycerol being present in the media, suggesting that the induction of *prpCD* is dependent  
226 on metabolism of glycerol at acidic pH (Figure 4A). To our knowledge, glycerol  
227 metabolism leading to the production of propionyl-CoA has not been documented in Mtb.  
228 However, in other bacterial species, three separate pathways for the production of  
229 propionyl-CoA have been described (23). One of these pathways, the propanediol  
230 pathway, involves the conversion of methylglyoxal to propionate (24). Given that  
231 methylglyoxal can accumulate in Mtb as a byproduct of dihydroxyacetone phosphate

232 (DHAP) metabolism, particularly after inhibition of glycolysis (3), we speculate that  
233 *prpCD* induction at acidic pH could be secondary to production of propionyl-CoA via this  
234 propanediol pathway or a related pathway (Figure 4B). However, whether Mtb contains  
235 enzymes capable of performing this metabolism is not known. Endogenous production of  
236 propionyl-CoA does not appear to be a necessary component of acidic pH growth arrest  
237 as growth arrested Mtb cultured in minimal medium with lactate does not induce *prpCD*  
238 at acidic pH; however, understanding this response could uncover additional aspects of  
239 Mtb metabolic remodeling that occurs during acidic pH growth arrest.

240

## 241 **Methods**

242

### 243 ***Bacterial strains and growth conditions***

244 Bacterial growth and strains are as previously described(11). Briefly, all Mtb  
245 experiments, unless otherwise stated, were performed with Mtb strain CDC1551.  
246 Cultures were maintained in 7H9 Middlebrook medium supplemented with 10% OADC  
247 and 0.05% Tween-80 and incubated with 5% CO<sub>2</sub>. All single carbon source experiments  
248 were performed in MMAT defined minimal medium as described by Lee *et al.* (22): 1 g/L  
249 KH<sub>2</sub>PO<sub>4</sub>, 2.5 g/L Na<sub>2</sub>PO<sub>4</sub>, 0.5 g/L (NH<sub>4</sub>)<sub>2</sub>SO<sub>4</sub>, 0.15 g/L asparagine, 10 mg/L MgSO<sub>4</sub>,  
250 50 mg/L ferric ammonium citrate, 0.1 mg/L ZnSO<sub>4</sub>, 0.5 mg/L CaCl<sub>2</sub>, and 0.05%  
251 Tyloxapol. Medium was buffered using 100 mM MOPS (pH 6.6–7.0) or MES (pH 5.7–  
252 6.5) (25).

### 253 ***RNA extraction and real time PCR***

254

255 Mtb cultures were grown at 37°C in T-25 vented, standing tissue culture flasks in 8 mL of  
256 a defined minimal medium seeded at an initial OD<sub>600</sub> of 0.25. After three days, total  
257 bacterial RNA was stabilized and extracted as previously described (4). Semi-  
258 quantitative real-time PCR was performed using previously described methods (5).  
259 Vitamin B12 was supplemented at 10 µg/mL and tetrahydrolipostatin (THL) was added

260 at a concentration of 20  $\mu$ M. All experiments were conducted with at least two biological  
261 replicates and repeated at least twice.

262

### 263 ***Analysis of mycobacterial lipids***

264 For lipid remodeling experiments, bacterial cultures were grown in 7H9 +10% OADC  
265 with either 8  $\mu$ Ci of [1,2- $^{14}$ C] sodium acetate or [1- $^{14}$ C] sodium propionate. Following 15  
266 days of labeling, the bacteria were pelleted and resuspended in the minimal medium  
267 containing glycerol as a single carbon source buffered to either pH 7.0 or pH 5.7. At day  
268 0, 6, and 12, two 1 mL aliquots were pelleted and fixed in 4% paraformaldehyde, and the  
269 remaining bacteria were pelleted, washed, and the lipids extracted as described  
270 previously (10). Total radioactivity and  $^{14}$ C incorporation were determined by scintillation  
271 counting of the fixed samples and the total extractable lipids, respectively. To analyze  
272 lipid species, 5,000 counts per minute (CPM) of the lipid sample was spotted at the  
273 origin of 100 cm<sup>2</sup> silica gel 60 aluminum sheets. To separate sulfolipid for quantification,  
274 the TLC was developed with a chloroform:methanol:water (90:10:1 v/v/v) solvent system  
275 (18). To separate TAG for quantification, the TLC was developed with a hexane:diethyl  
276 ether:acetic acid (80:20:1, v/v/v) solvent system (5). To examine TDM and TMM  
277 accumulation the TLC was developed in a chloroform:methanol:ammonium hydroxide  
278 (80:20:2 v/v/v) solvent system. Radiolabeled lipids were detected and quantified using a  
279 phosphor screen and a Typhoon Imager, and band density quantified using ImageQuant  
280 software (26). Radiolabeling experiments, lipid extractions and TLCs were repeated in  
281 at least two independent biological replicates with similar findings in both replicates.

282

283

284

285

286 **Acknowledgements**

287 We thank Prof. John McKinney for the generous gift of the  $\Delta icl1/2$  mutant and matched  
288 wild type control strain used in this study. JB was supported by a Robert J. Schultz  
289 student research award. This study was supported by funding from the Michigan State  
290 University start-up funds, AgBioResearch and grants from the NIH-NIAID (U54AI057153  
291 and R01AI116605).

292  
293 **Author Contributions**

294  
295 JB conducted the experiments and JB and RBA designed the experiments, analyzed the  
296 data and wrote the manuscript.



297 **References**

298

299 1. **McKinney JD, Honer zu Bentrup K, Munoz-Elias EJ, Miczak A, Chen B,**  
300 **Chan WT, Swenson D, Sacchettini JC, Jacobs WR, Jr., Russell DG.** 2000.  
301 Persistence of *Mycobacterium tuberculosis* in macrophages and mice requires  
302 the glyoxylate shunt enzyme isocitrate lyase. *Nature* **406**:735-738.

303 2. **Marrero J, Rhee KY, Schnappinger D, Pethe K, Ehrt S.** 2010. Gluconeogenic  
304 carbon flow of tricarboxylic acid cycle intermediates is critical for *Mycobacterium*  
305 *tuberculosis* to establish and maintain infection. *P Natl Acad Sci USA* **107**:9819-  
306 9824.

307 3. **Pethe K, Sequeira PC, Agarwalla S, Rhee K, Kuhlen K, Phong WY, Patel V,**  
308 **Beer D, Walker JR, Duraiswamy J, Jiricek J, Keller TH, Chatterjee A, Tan**  
309 **MP, Ujjini M, Rao SP, Camacho L, Bifani P, Mak PA, Ma I, Barnes SW, Chen**  
310 **Z, Plouffe D, Thayalan P, Ng SH, Au M, Lee BH, Tan BH, Ravindran S,**  
311 **Nanjundappa M, Lin X, Goh A, Lakshminarayana SB, Shoen C, Cynamon M,**  
312 **Kreiswirth B, Dartois V, Peters EC, Glynn R, Brenner S, Dick T.** 2009. A  
313 chemical genetic screen in *Mycobacterium tuberculosis* identifies carbon-source-  
314 dependent growth inhibitors devoid of in vivo efficacy. *Nature communications*  
315 **1**:57.

316 4. **Rohde KH, Abramovitch RB, Russell DG.** 2007. *Mycobacterium tuberculosis*  
317 invasion of macrophages: linking bacterial gene expression to environmental  
318 cues. *Cell Host Microbe* **2**:352-364.

319 5. **Abramovitch RB, Rohde KH, Hsu FF, Russell DG.** 2011. *aprABC*: a  
320 *Mycobacterium tuberculosis* complex-specific locus that modulates pH-driven  
321 adaptation to the macrophage phagosome. *Mol Microbiol* **80**:678-694.

322 6. **Rohde KH, Veiga DF, Caldwell S, Balazsi G, Russell DG.** 2012. Linking the  
323 transcriptional profiles and the physiological states of *Mycobacterium*  
324 *tuberculosis* during an extended intracellular infection. *PLoS Pathog* **8**:e1002769.

325 7. **Vandal OH, Pierini LM, Schnappinger D, Nathan CF, Ehrt S.** 2008. A  
326 membrane protein preserves intrabacterial pH in intraphagosomal  
327 *Mycobacterium tuberculosis*. *Nat Med* **14**:849-854.

328 8. **Levitte S, Adams KN, Berg RD, Cosma CL, Urdahl KB, Ramakrishnan L.**  
329 2016. Mycobacterial Acid Tolerance Enables Phagolysosomal Survival and  
330 Establishment of Tuberculous Infection In Vivo. *Cell Host Microbe* **20**:250-258.

331 9. **Perez E, Samper S, Bordas Y, Guilhot C, Gicquel B, Martin C.** 2001. An  
332 essential role for *phoP* in *Mycobacterium tuberculosis* virulence. *Mol Microbiol*  
333 **41**:179-187.

- 334 10. **Baker JJ, Johnson BK, Abramovitch RB.** 2014. Slow growth of *Mycobacterium*  
335 tuberculosis at acidic pH is regulated by *phoPR* and host-associated carbon  
336 sources. *Mol Microbiol* **94**:56-69.
- 337 11. **Baker JJ, Abramovitch RB.** 2018. Genetic and metabolic regulation of  
338 *Mycobacterium tuberculosis* acid growth arrest. *Sci Rep* **8**:4168.
- 339 12. **Munoz-Elias EJ, McKinney JD.** 2005. *Mycobacterium tuberculosis* isocitrate  
340 lyases 1 and 2 are jointly required for in vivo growth and virulence. *Nat Med*  
341 **11**:638-644.
- 342 13. **Eoh H, Rhee KY.** 2014. Methylcitrate cycle defines the bactericidal essentiality of  
343 isocitrate lyase for survival of *Mycobacterium tuberculosis* on fatty acids. *Proc*  
344 *Natl Acad Sci U S A* **111**:4976-4981.
- 345 14. **Savvi S, Warner DF, Kana BD, McKinney JD, Mizrahi V, Dawes SS.** 2008.  
346 Functional characterization of a vitamin B-12-dependent methylmalonyl pathway  
347 in *Mycobacterium tuberculosis*: Implications for propionate metabolism during  
348 growth on fatty acids. *J Bacteriol* **190**:3886-3895.
- 349 15. **VanderVen BC, Fahey RJ, Lee W, Liu Y, Abramovitch RB, Memmott C,**  
350 **Crowe AM, Eltis LD, Perola E, Deininger DD, Wang T, Locher CP, Russell**  
351 **DG.** 2015. Novel inhibitors of cholesterol degradation in *Mycobacterium*  
352 tuberculosis reveal how the bacterium's metabolism is constrained by the  
353 intracellular environment. *PLoS Pathog* **11**:e1004679.
- 354 16. **Griffin JE, Pandey AK, Gilmore SA, Mizrahi V, McKinney JD, Bertozzi CR,**  
355 **Sasseti CM.** 2012. Cholesterol catabolism by *Mycobacterium tuberculosis*  
356 requires transcriptional and metabolic adaptations. *Chem Biol* **19**:218-227.
- 357 17. **Datta P, Shi L, Bibi N, Balazsi G, Gennaro ML.** 2011. Regulation of central  
358 metabolism genes of *Mycobacterium tuberculosis* by parallel feed-forward loops  
359 controlled by sigma factor E ( $\sigma(E)$ ). *J Bacteriol* **193**:1154-1160.
- 360 18. **Asensio JG, Maia C, Ferrer NL, Barilone N, Laval F, Soto CY, Winter N,**  
361 **Daffe M, Gicquel B, Martin C, Jackson M.** 2006. The virulence-associated two  
362 component PhoP-PhoR system controls the biosynthesis of polyketide-derived  
363 lipids in *Mycobacterium tuberculosis*. *J Biol Chem* **281**:1313-1316.
- 364 19. **Walters SB, Dubnau E, Kolesnikova I, Laval F, Daffe M, Smith I.** 2006. The  
365 *Mycobacterium tuberculosis* PhoPR two-component system regulates genes  
366 essential for virulence and complex lipid biosynthesis. *Mol Microbiol* **60**:312-330.
- 367 20. **Gordhan BG, Smith DA, Kana BD, Bancroft G, Mizrahi V.** 2006. The carbon  
368 starvation-inducible genes Rv2557 and Rv2558 of *Mycobacterium tuberculosis*

369 are not required for long-term survival under carbon starvation and for virulence  
370 in SCID mice. *Tuberculosis* (Edinb) **86**:430-437.

371 21. **Jain M, Petzold CJ, Schelle MW, Leavell MD, Mougous JD, Bertozzi CR,**  
372 **Leary JA, Cox JS.** 2007. Lipidomics reveals control of *Mycobacterium*  
373 *tuberculosis* virulence lipids via metabolic coupling. *Proc Natl Acad Sci U S A*  
374 **104**:5133-5138.

375 22. **Lee W, Vanderven BC, Fahey RJ, Russell DG.** 2013. Intracellular  
376 *Mycobacterium tuberculosis* exploits host-derived fatty acids to limit metabolic  
377 stress. *J Biol Chem.*

378 23. **Reichardt N, Duncan SH, Young P, Belenguer A, Leitch C, Scott KP, Flint**  
379 **HJ, Louis P.** 2014. Phylogenetic distribution of three pathways for propionate  
380 production within the human gut microbiota. *The ISME Journal* **8**:1323-1335.

381 24. **Saxena RK, Anand P, Saran S, Isar J, Agarwal L.** 2010. Microbial production  
382 and applications of 1,2-propanediol. *Indian Journal of Microbiology* **50**:2-11.

383 25. **Piddington DL, Kashkouli A, Buchmeier NA.** 2000. Growth of *Mycobacterium*  
384 *tuberculosis* in a defined medium is very restricted by acid pH and Mg<sup>2+</sup> levels.  
385 *Infect Immun* **68**:4518-4522.

386 26. **Schneider CA, Rasband WS, Eliceiri KW.** 2012. NIH Image to ImageJ: 25  
387 years of image analysis. *Nature methods* **9**:671-675.

388  
389

390

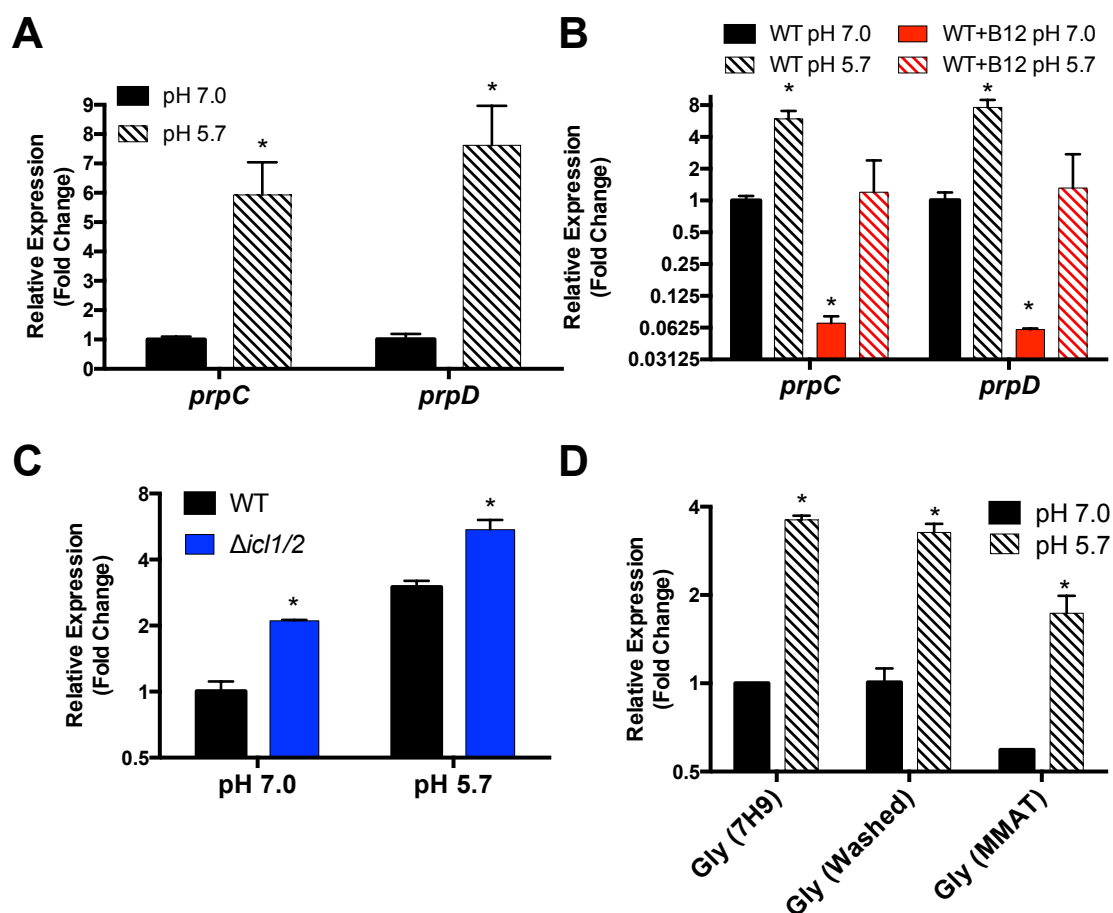

391  
392

**Figure 1. *prpCD* is induced at acidic pH and responds to alterations in propionyl-CoA metabolism.** A) Quantitative real time PCR (qPCR) of *prpC* and *prpD* mRNA at pH 7.0 and pH 5.7 with glycerol as a single carbon source confirms that *prpCD* are induced during acidic pH growth arrest. \* Significantly induced ( $p < 0.05$ ) at pH 5.7 relative to pH 7.0 (t test). B) *prpCD* expression at pH 7.0 and pH 5.7 is reduced with addition of vitamin B12. \* Significantly induced ( $p < 0.05$ ) at pH 5.7 relative to pH 7.0 (t test). C) *prpC* expression at pH 7.0 and pH 5.7 is increased in the  $\Delta icl1/2$  mutant. \* Significantly induced ( $p < 0.05$ ) at in *icl1/2* mutant relative to WT (t test). D) *prpC* induction at pH 5.7 in minimal medium with glycerol as a single carbon is observed in Mtb that was maintained prior to the experiment in 7H9+OADC rich medium-(Gly [7H9]), in 7H9+OADC and washed 3 times in PBS + 0.05% Tween 80 (Gly [Washed]), and in Mtb cultured in minimal medium with glycerol as a single carbon source buffered to pH 7.0 (Gly [MMAT]) \* Significantly induced ( $p < 0.05$ ) at pH 5.7 relative to pH 7.0 (t test). All experiments repeated at least twice with two independent biological replicates.

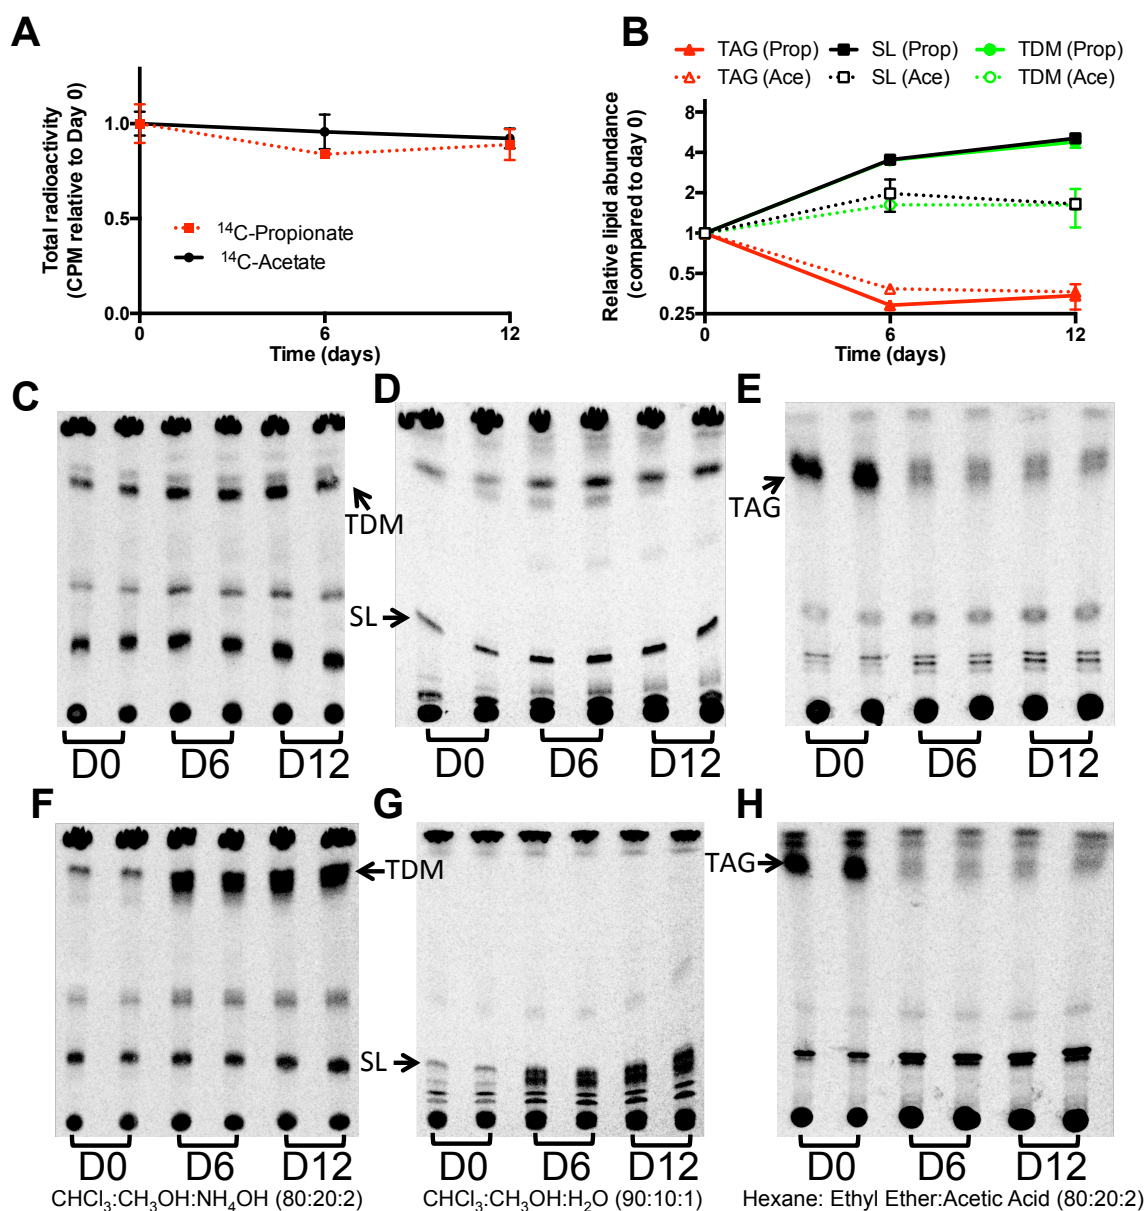

393

**Figure 2. Mtb utilizes endogenous TAG for the synthesis of TDM and SL at acidic pH.** Mtb was grown in the presence of <sup>14</sup>C-acetate or <sup>14</sup>C-propionate for 3 weeks prior to transferring to minimal medium containing glycerol as a single carbon source buffered to pH 5.7. A) Total radioactivity of Mtb whole cells over time. Over 12 days a ~10% reduction in radioactivity was observed. B) Relative lipid species abundance of triacylglycerol (TAG), sulfolipid (SL), and trehalose dimycolate (TDM) over time in Mtb labelled with <sup>14</sup>C-acetate (Ace) or <sup>14</sup>C-propionate (Prop). C-H) Thin Layer Chromatography (TLC) images showing relative abundance of TAG, SL and TDM at 0, 6, and 12 days after transfer of <sup>14</sup>C-acetate- (C-E) or <sup>14</sup>C-propionate- (F-H) labeled Mtb to acidic pH growth arrest (D0, D6, and D12, respectively).

394

395  
396

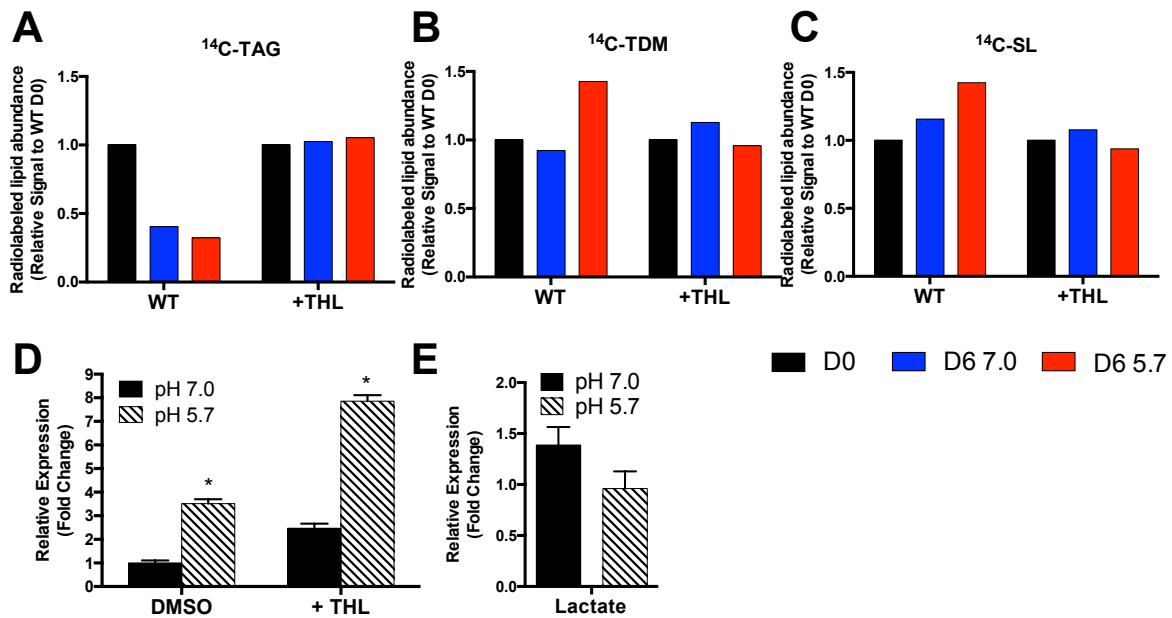

397  
398

**Figure 3. Inhibition of lipid remodeling at acidic pH increases *prpC* induction.** A-C) Remodeling of radiolabeled TAG, TDM, and SL at day 0 (D0) and after incubation for 6 days at pH 7.0 or pH 5.7 (D6 7.0 or D6 5.7, respectively) in minimal medium with glycerol as a single carbon source with or without the addition of the lipase inhibitor tetrahydrolipstatin (WT or +THL, respectively). Addition of THL blocks the ability of Mtb to undergo lipid remodeling. D) Addition of THL increases *prpC* expression at pH 7.0 and pH 5.7. \*Significantly induced ( $p < 0.05$ ) at pH 5.7 relative to pH 7.0 (t test). E) *prpC* is not induced at pH 5.7 with lactate as a single carbon source. Fold change is relative to Mtb grown in glycerol as a sole carbon source at pH 7.0.

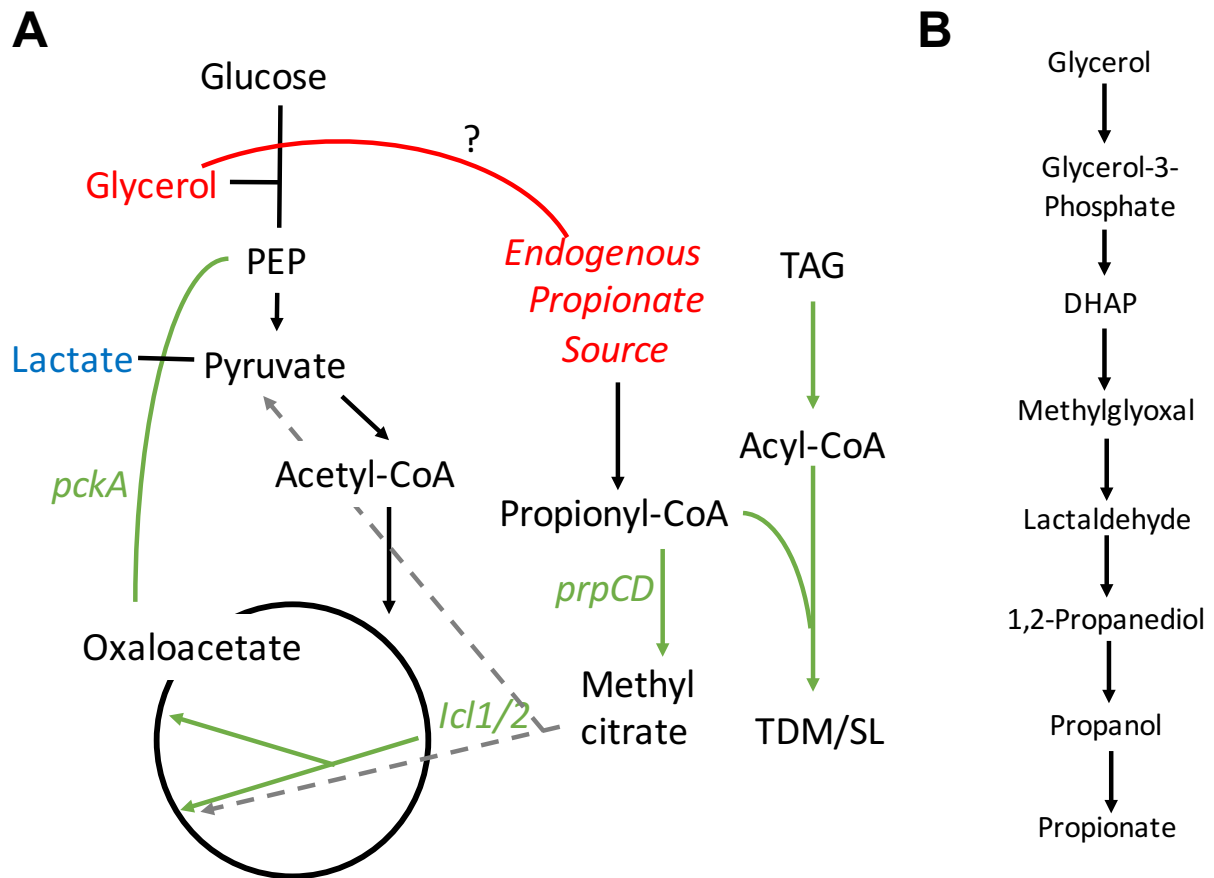

399

**Figure 4. Models for *prpCD* induction and metabolism remodeling during acidic pH growth arrest.** A) *prpCD* is induced during acidic pH growth arrest when glycerol is present in the medium, but not when lactate is the single carbon source. It is speculated that the metabolism of glycerol may lead to *de novo* synthesis of propionyl-CoA. The increased expression of *prpCD* in the absence of Mtb lipid remodeling of triacylglycerol (TAG) to sulfolipid (SL) and trehalose dimycolate (TDM) suggests that Mtb uses lipid remodeling as a sink for propionyl-CoA. B) Speculative metabolic pathway for the generation of propionate from glycerol that has been observed in microbes found in the human gut (23).
